# Supplementary material
Source: PubMed Central journal article supplement (PMC7374148)
Supplement: mmc1.pdf [file mmc1.pdf]

**Supplemental Appendix 1. Detailed inclusion and exclusion criteria.**

| Inclusion criteria                                                                                                                                                                                                                                                                                                                                                                                                                                                                                                                                                                                             | Exclusion Criteria                                                                                                                                                                                                                                                                                                                                                                                                                                                                                                                                                                                                                                                                                                                                                                                                                                                                                                                                                                                                                                                                                                                                                                                                                                                                                                                                                                                                                                                                                                                                                                                                                                                                                                                                                                                                                          |
|----------------------------------------------------------------------------------------------------------------------------------------------------------------------------------------------------------------------------------------------------------------------------------------------------------------------------------------------------------------------------------------------------------------------------------------------------------------------------------------------------------------------------------------------------------------------------------------------------------------|---------------------------------------------------------------------------------------------------------------------------------------------------------------------------------------------------------------------------------------------------------------------------------------------------------------------------------------------------------------------------------------------------------------------------------------------------------------------------------------------------------------------------------------------------------------------------------------------------------------------------------------------------------------------------------------------------------------------------------------------------------------------------------------------------------------------------------------------------------------------------------------------------------------------------------------------------------------------------------------------------------------------------------------------------------------------------------------------------------------------------------------------------------------------------------------------------------------------------------------------------------------------------------------------------------------------------------------------------------------------------------------------------------------------------------------------------------------------------------------------------------------------------------------------------------------------------------------------------------------------------------------------------------------------------------------------------------------------------------------------------------------------------------------------------------------------------------------------|
| <ul style="list-style-type: none"> <li>• Age 18 to 89 years.</li> <li>• Documented baseline serum creatinine defined as the outpatient, non-emergency department test value nearest to the index hospitalization within 7 and 365 days prior to admission using an IDMS-traceable serum creatinine assay.</li> <li>• In the TRIBE-AKI consortium, pre-operative serum creatinine results from an IDMS-traceable assay obtained within 7 days before cardiac surgery could be used to define baseline kidney function for the subset of participants who were undergoing non-urgent cardiac surgery.</li> </ul> | <ul style="list-style-type: none"> <li>• Inability to provide informed or surrogate consent.</li> <li>• Died before the three-month post-discharge baseline visit.</li> <li>• Incarcerated, institutionalized, or otherwise unable to participate in the study within a home, community, or clinical setting.</li> <li>• Enrolled in an active interventional study at the three-month in-person post-discharge baseline visit.</li> <li>• Actively pregnant or breastfeeding.</li> <li>• Chronic hemodialysis, peritoneal dialysis or estimated GFR &lt;15 ml/min/1.73 m<sup>2</sup> not receiving renal replacement therapy before index hospitalization.</li> <li>• Prior solid organ or hematopoietic cell transplant.</li> <li>• Acute glomerulonephritis diagnosed clinically or by biopsy.</li> <li>• Clinically significant urinary tract obstruction confirmed by imaging.</li> <li>• Hospitalization involving acute nephrectomy.</li> <li>• History of multiple myeloma.</li> <li>• Hepatorenal syndrome.</li> <li>• Metastatic cancer or actively treated systemic cancer.</li> <li>• New York Heart Association Class IV heart failure before index admission.</li> <li>• Predicted survival of 12 months or less as determined by the participant's treating physician or study Principal Investigator.</li> <li>• AKI participants who remain hospitalized 90 or more days after the AKI episode.</li> <li>• Receiving renal replacement therapy at the time of the three-month post-discharge baseline visit.</li> <li>• Unable to provide at least 1.5 mL of plasma for adults at the Inpatient visit.</li> <li>• Unable to provide at least 3 mL of urine for adults at the Inpatient visit.</li> <li>• Unable to provide at least 10 mL of blood for adults at the three-month post-discharge baseline visit.</li> </ul> |

**Supplemental Appendix 2. Severity of acute kidney injury and adverse clinical outcomes.**

|                                                                                                                                                      | Hazard Ratio (95% Confidence Interval) of AKI Severity* vs. No AKI |                     |                     |                     |                                            |                     |                      |                     |
|------------------------------------------------------------------------------------------------------------------------------------------------------|--------------------------------------------------------------------|---------------------|---------------------|---------------------|--------------------------------------------|---------------------|----------------------|---------------------|
|                                                                                                                                                      | Incident CKD                                                       | Progressive CKD     | Heart Failure       |                     | Major Atherosclerotic Cardiovascular Event |                     | Death from Any Cause |                     |
| Nested Model                                                                                                                                         | No Pre-existing CKD <sup>†</sup>                                   | Pre-existing CKD    | No Pre-existing CKD | Pre-existing CKD    | No Pre-existing CKD                        | Pre-existing CKD    | No Pre-existing CKD  | Pre-existing CKD    |
| Model 1: Matched <sup>‡</sup> cohort                                                                                                                 | 2.02<br>(1.55-2.63)                                                | 2.26<br>(1.52-3.35) | 1.59<br>(1.16-2.18) | 1.16<br>(0.93-1.45) | 0.84<br>(0.64-1.11)                        | 0.94<br>(0.70-1.27) | 1.32<br>(1.03-1.71)  | 1.76<br>(1.23-2.53) |
| Model 2: Model 1 + gender, race/ethnicity, sepsis during index admission, 3-month baseline visit smoking status, diabetes status and body mass index | 2.37<br>(1.60-3.52)                                                | 2.44<br>(1.54-3.85) | 1.51<br>(1.06-2.15) | 1.07<br>(0.83-1.38) | 0.79<br>(0.59-1.07)                        | 0.92<br>(0.66-1.27) | 1.19<br>(0.89-1.60)  | 1.86<br>(1.27-2.72) |
| Model 3: Model 2 + 3-month baseline visit estimated glomerular filtration rate, plasma cystatin C and urine protein-to-creatinine ratio              | N/A                                                                | N/A                 | 1.20<br>(0.89-1.61) | 0.86<br>(0.64-1.16) | 0.73<br>(0.54-0.99)                        | 0.83<br>(0.57-1.20) | 1.12<br>(0.79-1.58)  | 1.26<br>(0.82-1.94) |

\*AKI severity (KDIGO stage 1, 2 and 3) modeled as linear term.

<sup>†</sup>CKD denotes chronic kidney disease

<sup>‡</sup>Matching variables included Clinical Center, age, pre-index admission estimated glomerular filtration rate, pre-index admission diabetes status, prior cardiovascular disease, and intensive care unit stay during index admission.

**Supplemental Appendix 3. Category of duration of acute kidney injury and adverse clinical outcomes.**

| <b>Outcome*</b>             | <b>Adjusted† Hazard Ratio (95% Confidence Interval) of AKI Duration vs. No AKI</b> |                                  |                                   |                          |
|-----------------------------|------------------------------------------------------------------------------------|----------------------------------|-----------------------------------|--------------------------|
|                             | <b>AKI ≤1 day</b>                                                                  | <b>AKI &gt;1 day and ≤3 days</b> | <b>AKI &gt;3 days and ≤6 days</b> | <b>AKI &gt;6 days</b>    |
| <b>Incident CKD‡</b>        | <b>2.23 (1.46, 3.42)</b>                                                           | <b>8.58 (2.78, 26.5)</b>         | <b>5.71 (2.11, 15.4)</b>          | <b>3.70 (1.53, 8.98)</b> |
| <b>Progressive CKD</b>      | <b>0.94 (0.38, 23.0)</b>                                                           | <b>7.08 (2.18, 23.0)</b>         | <b>4.45 (1.03, 19.2)</b>          | <b>3.70 (1.59, 8.51)</b> |
| <b>Death from any cause</b> | <b>1.66 (1.06, 2.61)</b>                                                           | <b>1.87 (0.98, 3.57)</b>         | <b>2.98 (1.26, 7.02)</b>          | <b>1.80 (0.88, 3.66)</b> |
| <b>Heart Failure</b>        | <b>0.89 (0.50, 1.60)</b>                                                           | <b>2.58 (1.06, 6.26)</b>         | <b>2.46 (0.93, 6.52)</b>          | <b>4.80 (1.57, 14.6)</b> |

\* There was no significant association between category of duration of AKI episode and major atherosclerotic cardiovascular events when modeling category of AKI duration as a linear term, so results of the model using AKI duration as a categorical term are not presented.

† Matching variables included Clinical Center, age, pre-index admission estimated glomerular filtration rate, pre-index admission diabetes status, prior cardiovascular disease, and intensive care unit stay during index admission; covariates included gender; race/ethnicity; sepsis during index admission; and 3-month baseline visit smoking status, diabetes status, body mass index, estimated glomerular filtration rate, plasma cystatin C and urine protein-to-creatinine ratio.

‡ CKD denotes chronic kidney disease

**Supplemental Appendix 4. Acute kidney injury and adverse clinical outcomes in 1375 patients with and without AKI that were exactly matched on all matching criteria.**

|                                                                                                                                                      | Hazard Ratio (95% Confidence Interval) of AKI vs. No AKI |                     |                     |                     |                                            |                     |                      |                     |
|------------------------------------------------------------------------------------------------------------------------------------------------------|----------------------------------------------------------|---------------------|---------------------|---------------------|--------------------------------------------|---------------------|----------------------|---------------------|
|                                                                                                                                                      | Incident CKD                                             | Progressive CKD     | Heart Failure       |                     | Major Atherosclerotic Cardiovascular Event |                     | Death from Any Cause |                     |
| Nested Model                                                                                                                                         | No Pre-existing CKD*                                     | Pre-existing CKD    | No Pre-existing CKD | Pre-existing CKD    | No Pre-existing CKD                        | Pre-existing CKD    | No Pre-existing CKD  | Pre-existing CKD    |
| Model 1: Matched <sup>†</sup> cohort                                                                                                                 | 3.34<br>(2.40-4.67)                                      | 3.67<br>(2.04-6.59) | 2.68<br>(1.64-4.37) | 1.59<br>(1.06-2.36) | 0.68<br>(0.39-1.18)                        | 1.33<br>(0.85-2.09) | 1.70<br>(1.14-2.53)  | 2.66<br>(1.77-4.01) |
| Model 2: Model 1 + gender, race/ethnicity, sepsis during index admission, 3-month baseline visit smoking status, diabetes status and body mass index | 2.52<br>(1.82-3.50)                                      | 2.58<br>(1.50-4.44) | 2.67<br>(1.58-4.51) | 1.47<br>(0.95-2.28) | 0.77<br>(0.44-1.34)                        | 1.37<br>(0.86-2.17) | 1.45<br>(0.95-2.20)  | 2.75<br>(1.81-4.18) |
| Model 3: Model 2 + 3-month baseline visit estimated glomerular filtration rate, plasma cystatin C and urine protein-to-creatinine ratio              | N/A                                                      | N/A                 | 2.06<br>(1.19-3.56) | 1.01<br>(0.62-1.65) | 0.71<br>(0.39-1.26)                        | 1.18<br>(0.72-1.96) | 1.45<br>(0.92-2.30)  | 1.88<br>(1.18-3.01) |

\*CKD denotes chronic kidney disease

<sup>†</sup>Matching variables included Clinical Center, age, pre-index admission estimated glomerular filtration rate, pre-index admission diabetes status, prior cardiovascular disease, and intensive care unit stay during index admission.
